# Supplementary material for: Identification of Head and Neck Cancer Subtypes Based on Human Papillomavirus Presence and E2F-Regulated Gene Expression
Source: PubMed Central journal article supplement (PMC5760753; doi:10.1128/msphere.00580-17), 2018-01-10
Supplement: sph001182443sd1.pdf [file sph001182443sd1.pdf]

**Table S1. Rb-E2F pathway genes**

| <b><u>Gene</u></b> | <b><u>Common Name</u></b> | <b><u>P-value (t-test)</u></b> | <b><u>HPV(-) mean</u></b> | <b><u>HPV(+) mean</u></b> |
|--------------------|---------------------------|--------------------------------|---------------------------|---------------------------|
| RB1                | Rb                        | 6.17E-01                       | 1762.2                    | 1837.3                    |
| RBL1               | p107                      | 2.73E-07                       | 261.5                     | 446.6                     |
| RBL2               | p130                      | 9.95E-01                       | 1461.5                    | 1461.0                    |
| E2F1               | E2F1                      | 6.86E-07                       | 443.9                     | 1482.9                    |
| E2F2               | E2F2                      | 5.16E-17                       | 313.5                     | 791.4                     |
| E2F3               | E2F3                      | 8.25E-02                       | 516.9                     | 561.9                     |
| E2F4               | E2F4                      | 9.44E-14                       | 1932.0                    | 1383.3                    |
| E2F5               | E2F5                      | 9.93E-04                       | 63.5                      | 99.6                      |
| E2F6               | E2F6                      | 1.13E-06                       | 325.8                     | 396.8                     |
| E2F7               | E2F7                      | 3.33E-15                       | 341.6                     | 738.7                     |
| E2F8               | E2F8                      | 8.72E-15                       | 171.6                     | 440.3                     |
| CDKN1A             | p21                       | 3.27E-02                       | 8562.7                    | 7346.5                    |
| CDKN1B             | p27                       | 2.74E-11                       | 997.3                     | 1561.9                    |
| CDKN1C             | p57                       | 1.55E-05                       | 202.7                     | 585.1                     |
| CDKN2A             | p16INK4a/p14Arf           | 8.18E-14                       | 645.7                     | 3520.2                    |
| CDKN2B             | p15                       | 6.13E-01                       | 2021.2                    | 1931.8                    |
| CDKN2C             | p18                       | 3.19E-22                       | 319.4                     | 1932.7                    |
| CDKN2D             | p19INK4d                  | 2.67E-06                       | 322.8                     | 481.4                     |
| CCND1              | CCND1                     | 3.21E-24                       | 8431.0                    | 2324.0                    |
| CCNE1              | CCNE1                     | 7.67E-01                       | 284.2                     | 276.8                     |
| CDK2               | CDK2                      | 1.62E-26                       | 892.8                     | 1545.3                    |
| CDK4               | CDK4                      | 1.45E-03                       | 3045.0                    | 3582.9                    |
| CDK6               | CDK6                      | 5.20E-23                       | 3148.5                    | 958.2                     |
| TP53               | p53                       | 6.48E-20                       | 1251.3                    | 2773.7                    |
| MDM2               | MDM2                      | 3.97E-11                       | 1751.7                    | 2779.6                    |

**Table S2. E2F-Regulated Genes (ERG)**

ACOX1  
ACTA2  
ADAMTS1  
ANLN  
ANXA8  
APAF1  
APBB2  
APOE  
AR  
ARHGAP4  
ASH2L  
ATM  
AXIN2  
BACH1  
BAD  
BAK1  
BARD1  
BBC3  
BCL2  
BCL2L11  
BCL3  
BID  
BIRC5  
BLM  
BMI1  
BMP2  
BMPR1A  
BOK  
BRCA1  
BTG3  
BUB1  
BUB1B  
BUB3  
CALR  
CASP3  
CASP7  
CASP8  
CAV1  
CBFB  
CBX3

CBX5  
CCNA2  
CCNB1  
CCNB2  
CCND1  
CCND3  
CCNE1  
CCNE2  
CCNF  
CCNG2  
CD58  
CDC20  
CDC25A  
CDC25B  
CDC25C  
CDC6  
CDK2  
CDKN1C  
CDKN2C  
CDKN3  
CDS1  
CENPA  
CENPE  
CENPF  
CFLAR  
CHAF1A  
CHAF1B  
CHEK1  
CITED1  
CITED2  
CKS2  
COL11A1  
CPT1A  
CSDA  
CSRP2  
CSTF1  
CTGF  
DCK  
DDB2  
DEK  
DHFR

DHPS  
DMRT1  
DNMT1  
DTYMK  
DUT  
DYRK1A  
E2F1  
E2F2  
E2F3  
ECT2  
EED  
EGR1  
ENO3  
EPS8  
EZH2  
FEN1  
FGF2  
FGFR2  
FGFR3  
FIGNL1  
FOXM1  
FST  
GAB2  
GADD45A  
GADD45B  
GCH1  
GEM  
H2AFX  
H2AFZ  
HEY1  
HMMR  
HOXA7  
HOXA9  
HRK  
HUNK  
ID3  
IFNA2  
INCENP  
INHBA  
INMT  
ISYNA1

KIF4A  
KPNA2  
LHX2  
LIG1  
LMNB1  
LSM5  
MAD2L1  
MAF  
MAP2K1  
MAP2K2  
MAP3K14  
MAP3K5  
MAP3K7  
MAPK1  
MAPK3  
MAPK4  
MAPK8  
MAPK9  
MCL1  
MCM2  
MCM3  
MCM4  
MCM5  
MCM6  
MCM7  
MFAP1  
MKI67  
MLH1  
MMP16  
MRE11A  
MSH2  
MTHFD1  
MYB  
MYC  
NASP  
NEK2  
NFKB2  
NOLC1  
NPAT  
NRP1  
NUP107

NUP155  
ORC2L  
ORC3L  
ORC6L  
OSMR  
PAWR  
PBX3  
PCNA  
PDCD4  
PDGFRA  
PITX1  
PLAU  
PLSCR1  
PMAIP1  
PMF1  
PMS2  
PMS2L1  
POLA2  
POLD1  
POLE2  
PPM1D  
PPP1R13B  
PRC1  
PRG4  
PRIM1  
PRKAR2B  
PRPS1  
PTTG1  
RAD51  
RAD51C  
RAD52  
RAD54L  
RANBP9  
RB1  
RBL1  
RECQL  
RFC2  
RFC3  
RFC4  
RFC5  
ROD1

RPA1  
RPA2  
RPA3  
RRM1  
RRM2  
SERPINE1  
SERPINF2  
SFPQ  
SFRS2  
SKP2  
SLBP  
SLPI  
SMARCA2  
SMARCA5  
SNAPC1  
SOX9  
SPHK1  
SRPR  
STMN1  
SULT2A1  
TACC1  
TANK  
TCF19  
TCOF1  
TEAD4  
TGFA  
TGFB11  
TGFB2  
TGFB3  
TIMELESS  
TK1  
TMPO  
TNFSF9  
TOP2A  
TOPBP1  
TP53BP2  
TP73  
TTK  
TYMS  
UMPS  
UNG

USP1  
VEGFB  
VRK1  
XRCC4  
YY1  
AURKB  
FOXN3  
KIF2C  
CKS1B  
PLK1  
HIST1H2BE  
GJC1  
KIF20A  
HIST2H4A  
HMGB1  
CDCA7L  
HIST1H3D  
DNA2  
KIF22  
HIST1H2AD  
CDK1  
FAS  
PRIM2  
CENPK  
SRGAP2  
SMC2  
HSP90B1  
UBE2C  
HNRNPC  
TPX2  
CDCA4  
RACGAP1  
UHRF1  
HIST1H2AE  
SMC4  
HIST1H2BJ  
PBK  
FURIN  
PARP1  
HIST1H2BN  
CCNO



HMGB2  
LIMA1  
TBC1D2B  
FOXO1  
HIST1H2BO  
HIST1H3B  
HIST1H2BF  
SHCBP1  
UBE2T  
HIST1H3E  
KIF11  
SIRPA  
PEX19  
CDC45  
PLK4  
GRAMD4  
RAD51AP1  
DBF4  
SIVA1  
MELK  
HMGB3  
FOXO3  
ASF1B  
FGFR1OP  
HIST1H2AC  
KIFC1  
DIABLO  
SSX2IP  
KBTBD10  
VIPR1  
AURKA  
NUSAP1  
CDC7  
GINS1  
VEGFA  
PLK2  
FANCL  
KIF20B  
NDC80

**Table S3. Uniquely Regulated Genes in HPV(-) Low ERG HNSC Tumors**

SGOL1  
KIF15  
CCNA2  
KIF11  
CENPK  
NUSAP1  
RACGAP1  
HMGB2  
MSH2  
RFC5  
SMC4  
RBMX  
BUB1B  
ZWINT  
ASPM  
HELLS  
DEPDC1  
CDCA7  
BUB1  
SKA1  
PLK4  
MCM6  
CDC7  
SGOL2  
CENPF  
NUF2  
ZNF367  
TOP2A  
CIT  
ERCC6L  
YEATS4  
CDCA2  
BRCA1  
TTK  
CEP152  
ARHGAP11A  
ATAD5  
PBK  
RFC3  
TRAIP

BRIP1  
MCM3  
MCM10  
CEP78  
CENPE  
DBF4  
ZWILCH  
KIF20A  
CDK1  
CENPH  
KIFC1  
SKA3  
XPO1  
RMI1  
WDR76  
NEIL3  
GEN1  
C15orf42  
PRIM1  
DCK  
KIF20B  
GINS4  
DEK  
CHAF1B  
CCDC18  
HNRNPR  
CDC25A  
MSH6  
DNA2  
LRRCC1  
SPC25  
C12orf32  
PRC1  
MAD2L1  
CCNB1  
C14orf106  
CDCA8  
SMC2  
POLE2  
NCAPG2  
CCDC21

KIF18A  
SASS6  
SFRS7  
FANCI  
NEK2  
FBXO5  
NCAPH  
RRM2  
ORC1L  
LIN9  
C14orf145  
DNAJC9  
POC1A  
C21orf45  
STIL  
ASF1B  
SNRNP40  
NCAPG  
SMC3  
CKAP2L  
RFC2  
MND1  
C17orf53  
IQGAP3  
LOC100128191  
CPSF6  
DCLRE1A  
NLRX1  
RRM1  
CDC25C  
MCM4  
C4orf21  
CCDC138  
DNMT1  
MKI67  
DLGAP5  
CCNB2  
GINS2  
TYMS  
DHX9  
MCM7

BLM  
RCC1  
DUT  
UHRF1  
KIF23  
GSG2  
POLQ  
USP39  
H2AFZ  
CENPQ  
NUP54  
LYNX1  
BRCA2  
CDT1  
C4orf46  
CEP192  
TOM1  
C6orf167  
HMMR  
GINS1  
SART3  
ARHGAP11B  
KHDRBS1  
FANCM  
CHAF1A  
STMN1  
KNTC1  
WHSC1  
CEP110  
DEPDC1B  
CENPW  
METRNL  
SCLT1  
RAD54B  
KIF4B  
KIF18B  
TROAP  
CASP8AP2  
HNRNPA1L2  
PSRC1  
GSTCD

HNRNPU  
NUP107  
C10orf119  
TMEM97  
POC5  
ATP6V0D1  
SPATA5  
NCAPD3  
CENPM  
OIP5  
HAT1  
SNRNP48  
KIAA1539  
EPHB3  
SMC6  
TPX2  
TOPBP1  
TMEM79  
TTF2  
NCAPD2  
EXO1  
RBL1  
ELAVL1  
RAD51L3  
FEN1  
CHEK1  
NDC80  
C1orf112  
XRCC2  
ATAD2  
KIF4A  
CDC6  
CENPI  
CENPN  
PHF19  
ATP6V0A1  
MELK  
C11orf82  
KRT6B  
VRK1  
LYPD3

TOLLIP  
NIF3L1  
FAM72B  
SLC24A3  
SRRT  
SPAG5  
KIAA0101  
MTHFD1  
IMMT  
TAF5  
ORC3L  
KIF22  
DCLRE1B  
NASP  
C13orf34  
HNRNPL  
C10orf137  
TMEM194A  
GTSE1  
DSN1  
CEP135  
UBR7  
NR2C2AP  
CDK2  
CASC5  
GRN  
H2AFV  
POLE3  
TFAM  
RACGAP1P  
PPIL5  
SFRS2  
C19orf40  
EPR1  
KRT6C  
HJURP  
METTL4  
CLSPN  
GMNN  
S100A7  
FANCC

EXOSC9  
MPHOSPH9  
RAD51AP1  
DBF4B  
PARP2  
TIPIN  
DTL  
TIMELESS  
SLC5A10  
PNN  
C12orf24  
CST3  
SPC24  
PPP5C  
RAD51  
SF3A3  
TMPRSS13  
THEM5  
HNRNPA2B1  
TTF1  
PARP1  
WBP11  
PRELID2  
SENP1  
POLD1  
UBE2T  
LIMK2  
DKFZp779M0652  
CCDC41  
C2orf44  
HNRNPD  
SRRM1  
FANCB  
FAM72D  
IVL  
WDR67  
MCM8  
CTCF  
SULT2B1  
CCNF  
TRIM59



CCDC77  
RBBP8  
SKA2  
UPF3B  
HNRNPH3  
CDC23  
C9orf100  
ADAP2  
LSM6  
FANCA  
FANCG  
CTDSPL2  
KIAA0146  
MASTL  
MSH5  
SNRPA  
MVP  
C12orf65  
NUCKS1  
WDHD1  
DDX12  
NAA40  
MIS12  
SSRP1  
HMGB1  
C21orf58  
JUP  
RNF11  
LBR  
ALG10  
POLA2  
C18orf56  
AURKB  
TMC06  
C13orf27  
CDCA7L  
KLK11  
FOXM1  
POLG2  
KHSRP  
KIAA1731

RPAP3  
ARL6IP1  
DMKN  
UBA2  
SFRS1  
RAD54L  
GLTPD1  
POLR3K  
DDX20  
PCGF6  
LOC642846  
NARG2  
ALMS1  
PPP2R2C  
HAUS6  
PAFAH1B3  
CHEK2  
CENPL  
CYB5R1  
MCM3APAS  
C2orf48  
SNAPC5  
TUBB2A  
MRPL35  
SLC22A23  
TRIM29  
SFN  
BNIPL  
IFT81  
CDC20  
CKS2

5-Sep

MUTYH  
S100A12  
AKAP1  
MICALL1  
NONO  
SEPHS1  
SNX33  
C2orf3  
PAXIP1

HMGXB4  
TRIM37  
IL1F5  
DGKE  
CHTF18  
KRT10  
GORAB  
CENPA  
RPA3  
RECQL4  
C19orf48  
ECT2  
C1orf174  
KIF14  
MAFB  
KIAA1524  
TFAP4  
CCDC150  
TMEM48  
IGFL1  
SNRNP25  
SCN3B  
FAHD1  
SFPQ  
KRT8  
ILF2  
ZRANB3  
RBM12B  
DFFB  
ITPKA  
ARL6IP6  
NIPAL4  
DCTPP1  
HAUS8  
SLC39A2  
IFT80  
LOC200030  
KPNA2  
WDR92  
GAS2L3  
MCM5

TRIP13  
E2F7  
CDC5L  
PLEKHM1  
TTC21B  
POLR2D  
CDA  
ANKRD26  
AMFR  
CCDC45  
CDC45  
TOR3A  
C7orf44  
ORC6L  
ZNF26  
ZFYVE1  
CCBP2  
CCDC15  
FAM64A  
TREX2  
MYO19  
C18orf54  
DHX35  
SLC29A2  
NUP85  
ANP32E  
KIF2C  
MAPK3  
ABCA12  
SRBD1  
TPR  
TMEM185A  
PLD2  
SPRR2E  
IMMP1L  
NUDT1  
PPP1CC  
LRP10  
ORC2L  
KIF1C  
POLD4

PDZK1IP1  
SLC5A1  
CCDC75  
NUP160  
RNASEH2A  
TACC3  
KLK6  
CDK4  
CSTF3  
C15orf23  
LIN52  
NVL  
LSM4  
FAM54A  
ANKRD36B  
KCTD10  
TRMT11  
SLC15A1  
PIF1  
ZNF195  
CCDC111  
PLA2G4E  
UIMC1  
QTRTD1  
ZNF530  
SLC25A19  
FAM72A  
FBXO43  
NUP62CL  
OTUB2  
AIM1L  
RPIA  
C1orf109  
UBE2S  
C14orf143  
CEP57  
LYPD5  
C6orf132  
C4orf3  
RSPH3  
RNASEH2B

MTBP  
TUBGCP3  
CTSA  
DNAJB6  
ITM2B  
LGALS7B  
NUP188  
DARS2  
NOD2  
NCBP1  
PROSC  
CDCA3  
VASN  
NAP1L1  
SMC1A  
MCM2  
GABPB1  
TCERG1  
PFKFB2  
SKP2  
GTF3C5  
ALOX12B  
C1orf135  
TUBA1B  
PPIH  
NOL8  
C9orf80  
BIRC5  
BAZ1B  
MAK16  
ARHGEF37  
C6orf25  
MDC1  
CST6  
PLCD1  
SDR9C7  
NUP35  
PLIN3  
TAF8  
RNF39  
LTB4R2

DLEU2L  
DDX11  
TAF6  
CHML  
TMEM86A  
SET  
EPB41L2  
RAD21  
NUP37  
TFRC  
ODF2  
C10orf35  
CENPO  
PHF6  
PTPLAD1  
RCCD1  
ACTL6A  
TMEM40  
CCDC148  
PIM1  
E2F5  
CITED4  
HNRNPK  
CCDC163P  
ZNF670  
RHBDF1  
RAVER1  
TFDP1  
MED8  
MAF  
LOC144438  
AGPAT5  
HYLS1  
FIP1L1  
LOC341056  
DSCC1  
ZBTB2  
METTL10  
ERCC8  
PSMC3IP  
RSRC2

S100A9  
TPST2  
GPR78  
EME1  
FAM174A  
ATP6V0C  
THOC1  
RASAL1  
NUP133  
PRIM2  
RFC4  
AQP3  
CEP55



**Table S4. Genes Uniquely Upregulated in HPV(-) Low ERG HNSCC Tumors**

KIAA1539  
KRT6B  
GRN  
KRT6C  
S100A7  
SLC5A10  
THEM5  
LIMK2  
ADAP2  
MVP  
JUP  
DMKN  
PPP2R2C  
CYB5R1  
TUBB2A  
SLC22A23  
SFN  
S100A12  
MICALL1  
IL1F5  
KRT10  
MAFB  
IGFL1  
NIPAL4  
CDA  
TREX2  
ABCA12  
TMEM185A  
SPRR2E  
KLK6  
SLC15A1  
PLA2G4E  
LYPD5  
CTSA  
LGALS7B  
NOD2  
ALOX12B  
CST6  
SDR9C7  
LTB4R2

TMEM86A

CITED4

MED8

MAF

TPST2

**Table S5. Differentially regulated networks in uniquely up-regulated genes in HPV(-) low ERG tumors.**

| <b>ID</b> | <b>Molecules in Network</b>                                                                                                                                                                                                                                                       | <b>Score</b> | <b>Focus Molecules</b> | <b>Top Diseases and Functions</b>                                                                             |
|-----------|-----------------------------------------------------------------------------------------------------------------------------------------------------------------------------------------------------------------------------------------------------------------------------------|--------------|------------------------|---------------------------------------------------------------------------------------------------------------|
| 1         | APOH,CRABP2,DSC2,DSG3,DUSP14,EHF,ERK,IgG,JUP,KLK5,KLK6,KLK7,KLK8,KLK11,KRT10,KRT14,KRT15,KRT16,KRT6B,KSR2, LGALS7/LGALS7B,LTB4R2,MVP,NFkB (complex),NOD2,PELI2,PPP2R2C,PPP2R5E,S100A7,S100A12,SPIB,SPRR2E,TAC4,TRIP6,TUBB2A                                                       | 26           | 13                     | Dermatological Diseases and Conditions, Inflammatory Disease, Inflammatory Response                           |
| 2         | ABCA12,ALOX12B,AMOTL2,ATP1B3,CASP3,CD300C,CDA,E4F1,EHD1,GMPS,GRN,HIP1,IL36RN,LILRA5,LIMK2,LSS,MAF,MAFB,miR-17-3p (and other miRNAs w/seed CUGCAGU),miR-378a-3p (and other miRNAs w/seed CUGGACU),NINJ1,PPT1,RB1,SCO2,SEMA3C,SFN,SLC7A2,SQLE,SYVN1,TGM2,TINCR,TNF,TP53,UBQLN2,UGCG | 16           | 9                      | Cell Death and Survival, Cellular Development, Cellular Compromise                                            |
| 3         | MMP11,SDR9C7                                                                                                                                                                                                                                                                      | 2            | 1                      | Developmental Disorder, Cancer, Cardiovascular Disease                                                        |
| 4         | IGFL1,IGFLR1                                                                                                                                                                                                                                                                      | 2            | 1                      | Cancer, Gastrointestinal Disease, Organismal Injury and Abnormalities                                         |
| 5         | CITED4,FGF8                                                                                                                                                                                                                                                                       | 2            | 1                      | Cardiovascular System Development and Function, Cellular Development, Cellular Growth and Proliferation       |
| 6         | KRT6C,MGEA5                                                                                                                                                                                                                                                                       | 2            | 1                      | Cardiovascular System Development and Function, Dermatological Diseases and Conditions, Hereditary Disorder   |
| 7         | DGKA,MICALL1,RAB13                                                                                                                                                                                                                                                                | 2            | 1                      | Cell-To-Cell Signaling and Interaction, Cellular Assembly and Organization, Cellular Function and Maintenance |
| 8         | 26s Proteasome,CTSA,GLB1                                                                                                                                                                                                                                                          | 2            | 1                      | Developmental Disorder, Hereditary Disorder, Metabolic Disease                                                |
| 9         | MED8,MED26,MED29,POLR2A,SPEN                                                                                                                                                                                                                                                      | 2            | 1                      | Infectious Diseases, DNA Replication, Recombination, and Repair, Cancer                                       |

**Table S6. Clinical correlations using Chi Squared Test**

**p.value: 1.705203e-42** HPV(-) high HPV(-) low HPV(+)  
 anatomic\_organ\_subdivision

|                |    |    |    |
|----------------|----|----|----|
| Alveolar Ridge | 3  | 11 | 4  |
| Base of tongue | 5  | 6  | 16 |
| Buccal Mucosa  | 11 | 8  | 0  |
| Floor of mouth | 25 | 32 | 1  |
| Hard Palate    | 0  | 6  | 1  |
| Hypopharynx    | 2  | 4  | 2  |
| Larynx         | 51 | 56 | 2  |
| Lip            | 1  | 2  | 0  |
| Oral Cavity    | 22 | 42 | 5  |
| Oral Tongue    | 33 | 84 | 4  |
| Oropharynx     | 3  | 4  | 1  |
| Tonsil         | 6  | 2  | 34 |

---

**p.value: 8.20524e-16** HPV(-) high HPV(-) low HPV(+)  
 tumor\_grade

|    |    |     |    |
|----|----|-----|----|
| G1 | 10 | 48  | 1  |
| G2 | 96 | 165 | 26 |
| G3 | 49 | 41  | 28 |
| G4 | 1  | 0   | 6  |
| GX | 5  | 3   | 7  |

---

**p.value: 1.786039e-07** HPV(-) high HPV(-) low HPV(+)  
 clinical\_N

|     |    |     |    |
|-----|----|-----|----|
| N0  | 80 | 134 | 18 |
| N1  | 21 | 48  | 8  |
| N2  | 6  | 8   | 4  |
| N2a | 3  | 5   | 9  |
| N2b | 24 | 26  | 23 |
| N2c | 18 | 20  | 4  |
| N3  | 2  | 3   | 3  |
| NX  | 8  | 9   | 1  |

---

**p.value: 0.0009039816** HPV(-) high HPV(-) low HPV(+)  
gender

|        |     |     |    |
|--------|-----|-----|----|
| FEMALE | 42  | 83  | 7  |
| MALE   | 120 | 174 | 63 |

---

**p.value: 0.0009852978** HPV(-) high HPV(-) low HPV(+)  
perineural\_invasion

|     |    |    |    |
|-----|----|----|----|
| NO  | 66 | 88 | 27 |
| YES | 54 | 99 | 6  |

---

**p.value: 0.002194297** HPV(-) high HPV(-) low HPV(+)  
histologic\_diagnosis

|                          |     |     |    |
|--------------------------|-----|-----|----|
| Head and Neck Squamous ( | 160 | 255 | 65 |
| Head and Neck Squamous ( | 0   | 1   | 0  |
| Head and Neck Squamous ( | 2   | 1   | 5  |

---

**p.value: 0.005728068** HPV(-) high HPV(-) low HPV(+)  
ajcc\_tumor\_pathologic\_pt

|     |    |    |    |
|-----|----|----|----|
| T0  | 0  | 1  | 0  |
| T1  | 12 | 26 | 7  |
| T2  | 41 | 64 | 23 |
| T3  | 38 | 51 | 6  |
| T4  | 4  | 4  | 1  |
| T4a | 53 | 84 | 10 |
| T4b | 1  | 3  | 0  |
| TX  | 10 | 15 | 13 |

---

**p.value: 0.007140524** HPV(-) high HPV(-) low HPV(+)  
ajcc\_nodes\_pathologic\_pn

|    |    |     |    |
|----|----|-----|----|
| N0 | 53 | 103 | 13 |
| N1 | 26 | 26  | 8  |

|     |    |    |    |
|-----|----|----|----|
| N2  | 5  | 4  | 2  |
| N2a | 3  | 3  | 3  |
| N2b | 31 | 47 | 14 |
| N2c | 19 | 24 | 1  |
| N3  | 4  | 2  | 1  |
| NX  | 18 | 28 | 18 |

---

**p.value: 0.007787052** HPV(-) high HPV(-) low HPV(+)  
margin\_status

|          |     |     |    |
|----------|-----|-----|----|
| Close    | 20  | 20  | 6  |
| Negative | 115 | 188 | 27 |
| Positive | 16  | 27  | 13 |

---

**p.value: 0.00876613** HPV(-) high HPV(-) low HPV(+)  
vital\_status

|       |     |     |    |
|-------|-----|-----|----|
| Alive | 102 | 168 | 58 |
| Dead  | 60  | 89  | 12 |

---

**p.value: 0.008968685** HPV(-) high HPV(-) low HPV(+)  
ajcc\_metastasis\_pathologic\_pm

|    |    |    |    |
|----|----|----|----|
| M0 | 54 | 94 | 19 |
| MX | 21 | 18 | 13 |

---

**p.value: 0.0100549** HPV(-) high HPV(-) low HPV(+)  
clinical\_M

|    |     |     |    |
|----|-----|-----|----|
| M0 | 149 | 247 | 70 |
| M1 | 2   | 1   | 0  |
| MX | 11  | 4   | 0  |

---

**p.value: 0.02056691** HPV(-) high HPV(-) low HPV(+)  
clinical\_T

|     |    |    |    |
|-----|----|----|----|
| T1  | 5  | 18 | 8  |
| T2  | 46 | 67 | 30 |
| T3  | 46 | 71 | 12 |
| T4  | 6  | 12 | 3  |
| T4a | 50 | 82 | 14 |
| T4b | 2  | 0  | 1  |
| TX  | 7  | 3  | 2  |

---

**p.value: 0.02233873**    HPV(-) high   HPV(-) low   HPV(+)  
tobacco\_smoking\_history\_indicator

|                         |    |    |    |
|-------------------------|----|----|----|
| Current reformed smoker | 49 | 58 | 24 |
| Current reformed smoker | 15 | 45 | 9  |
| Current Reformed Smoker | 0  | 2  | 0  |
| Current smoker          | 63 | 89 | 15 |
| Lifelong Non-smoker     | 30 | 57 | 21 |

---

**p.value: 0.02732582**    HPV(-) high   HPV(-) low   HPV(+)  
alcohol\_consumption\_frequency

|     |    |    |    |
|-----|----|----|----|
| 0   | 13 | 28 | 9  |
| 1   | 5  | 10 | 5  |
| 2   | 4  | 5  | 1  |
| 2.5 | 0  | 0  | 1  |
| 3   | 3  | 1  | 2  |
| 4   | 6  | 1  | 3  |
| 5   | 2  | 2  | 2  |
| 6   | 4  | 0  | 0  |
| 7   | 35 | 54 | 11 |

---

**p.value: 0.0379805**    HPV(-) high   HPV(-) low   HPV(+)  
tumor\_status

|            |    |     |    |
|------------|----|-----|----|
| TUMOR FREE | 93 | 166 | 52 |
| WITH TUMOR | 54 | 66  | 13 |

---

**p.value: 0.04655292**    HPV(-) high   HPV(-) low   HPV(+)

laterality

|         |    |    |    |
|---------|----|----|----|
| Left    | 47 | 62 | 22 |
| Midline | 11 | 19 | 1  |
| Right   | 41 | 72 | 37 |

---

**p.value: 0.05163609**      HPV(-) high   HPV(-) low   HPV(+)  
clinical\_stage

|           |    |     |    |
|-----------|----|-----|----|
| Stage I   | 3  | 14  | 2  |
| Stage II  | 33 | 50  | 10 |
| Stage III | 33 | 61  | 7  |
| Stage IVA | 80 | 120 | 48 |
| Stage IVB | 4  | 3   | 3  |
| Stage IVC | 2  | 2   | 0  |

---

**p.value: 0.06669432**      HPV(-) high   HPV(-) low   HPV(+)  
race

|                         |     |     |    |
|-------------------------|-----|-----|----|
| AMERICAN INDIAN OR ALA' | 0   | 2   | 0  |
| ASIAN                   | 1   | 10  | 0  |
| BLACK OR AFRICAN AMERIC | 16  | 16  | 3  |
| WHITE                   | 137 | 219 | 67 |

---



**Table S7. Recurrent mutated genes in each HNSCC group that are not mutated in the other two groups.**

| HPV(-) low ERG |       | HPV(-) high ERG |       | HPV(+)    |       |
|----------------|-------|-----------------|-------|-----------|-------|
| Gene           | Count | Gene            | Count | Gene      | Count |
| DCAF12L1       | 9     | FRMPD2          | 7     | CCBE1     | 3     |
| DRP2           | 8     | ZNF507          | 7     | FCGR2A    | 3     |
| ALCAM          | 7     | FOXP1           | 6     | ISY1      | 3     |
| CASP8AP2       | 7     | ATP11B          | 5     | NAB2      | 3     |
| KDM3B          | 7     | ATP2A2          | 5     | RAB2A     | 3     |
| SEMA4G         | 7     | GPR161          | 5     | SLC25A19  | 3     |
| SOX9           | 7     | GYPA            | 5     | SYT14     | 3     |
| TNPO2          | 7     | MFHAS1          | 5     | ACP5      | 2     |
| TUBD1          | 7     | PLEKHH1         | 5     | ANGPTL7   | 2     |
| USP28          | 7     | PSG2            | 5     | AP1AR     | 2     |
| ABCA5          | 6     | SEC23B          | 5     | ARSE      | 2     |
| ATP2B4         | 6     | THAP5           | 5     | BIN3      | 2     |
| CCDC7          | 6     | ANP32E          | 4     | C21orf128 | 2     |
| GUCY2D         | 6     | AQP9            | 4     | CAPS      | 2     |
| HTR6           | 6     | CAPN10          | 4     | CDSN      | 2     |
| LINGO4         | 6     | CC2D2B          | 4     | CEP55     | 2     |
| LONP2          | 6     | CCL1            | 4     | CINP      | 2     |
| MAVS           | 6     | CHIT1           | 4     | COPZ2     | 2     |
| NEK8           | 6     | CLDN10          | 4     | DPH3      | 2     |
| OR10G8         | 6     | CNNM3           | 4     | EIF2S1    | 2     |
| SGK2           | 6     | COL10A1         | 4     | EMX1      | 2     |
| SH2D1A         | 6     | CXXC4           | 4     | FKBP11    | 2     |
| STRN4          | 6     | DDI1            | 4     | FNDC7     | 2     |
| USP6NL         | 6     | DMRTC2          | 4     | GGA3      | 2     |
| A1BG           | 5     | DPEP3           | 4     | GNL1      | 2     |
| ANKMY1         | 5     | FAM171A1        | 4     | HMG20B    | 2     |
| AP3B2          | 5     | FBXO30          | 4     | HSPB8     | 2     |
| ARMCX5         | 5     | GPR115          | 4     | KATNB1    | 2     |
| BPI            | 5     | HPSE            | 4     | KIR3DL3   | 2     |
| CA8            | 5     | KRT6A           | 4     | MAD2L2    | 2     |
| CACNG6         | 5     | LARP6           | 4     | MED11     | 2     |
| COCH           | 5     | LPPR5           | 4     | MYLPF     | 2     |
| COL2A1         | 5     | LZTFL1          | 4     | NCSTN     | 2     |
| CSHL1          | 5     | MAPRE2          | 4     | NRG4      | 2     |
| CWC22          | 5     | MCM3            | 4     | NTNG2     | 2     |
| CYP26B1        | 5     | NFIB            | 4     | OR1F1     | 2     |
| DLG4           | 5     | OR2A14          | 4     | OTC       | 2     |
| EFCAB4B        | 5     | OR52A5          | 4     | PCBP4     | 2     |
| GLRA2          | 5     | PAQR7           | 4     | PHF7      | 2     |
| GULP1          | 5     | PRKAB1          | 4     | POLR3D    | 2     |

|          |   |           |   |         |   |
|----------|---|-----------|---|---------|---|
| HDAC2    | 5 | PRSS48    | 4 | PPP1CB  | 2 |
| HIST1H4E | 5 | PSG5      | 4 | PRKD2   | 2 |
| IDUA     | 5 | RAB37     | 4 | PSPN    | 2 |
| IKBKE    | 5 | RIMS3     | 4 | RIOK1   | 2 |
| KCTD1    | 5 | RRAGC     | 4 | RNF113A | 2 |
| KPNA6    | 5 | SGK3      | 4 | SLC3A1  | 2 |
| LILRB3   | 5 | SH3BP2    | 4 | SMARCA5 | 2 |
| MDH1B    | 5 | SLC25A6   | 4 | SPRR2E  | 2 |
| MEPE     | 5 | SPRED2    | 4 | SUV39H2 | 2 |
| MLLT6    | 5 | TAB2      | 4 | TBX10   | 2 |
| MYO6     | 5 | TDO2      | 4 | TOLLIP  | 2 |
| NEUROD1  | 5 | TMBIM4    | 4 | TOP1    | 2 |
| NKAP     | 5 | UNC50     | 4 | TRAIP   | 2 |
| PPM1D    | 5 | USP44     | 4 | TRIM59  | 2 |
| RAB3IP   | 5 | VEGFC     | 4 | UBQLN1  | 2 |
| RAD51AP1 | 5 | ZBTB40    | 4 | ZER1    | 2 |
| SCIN     | 5 | ZCCHC7    | 4 | ZNF627  | 2 |
| SLC22A2  | 5 | ZNF442    | 4 |         |   |
| SLC5A1   | 5 | ZNF641    | 4 |         |   |
| STAG1    | 5 | ZNF83     | 4 |         |   |
| TRIM43   | 5 | AATF      | 3 |         |   |
| USP5     | 5 | ABHD5     | 3 |         |   |
| ZBTB3    | 5 | ACBD4     | 3 |         |   |
| ZDHHC8   | 5 | ACSF3     | 3 |         |   |
| ZNF271   | 5 | ADCK2     | 3 |         |   |
| ACAP2    | 4 | ALG11     | 3 |         |   |
| ACRBP    | 4 | ALPP      | 3 |         |   |
| ACTRT2   | 4 | ANKRD24   | 3 |         |   |
| ADORA1   | 4 | ARHGAP18  | 3 |         |   |
| ALOX5    | 4 | ARHGEF9   | 3 |         |   |
| ALPL     | 4 | ASB10     | 3 |         |   |
| AOC2     | 4 | ATP6V1B1  | 3 |         |   |
| APOL4    | 4 | AURKB     | 3 |         |   |
| ARHGEF11 | 4 | B3GNT1    | 3 |         |   |
| ATXN7    | 4 | BDKRB2    | 3 |         |   |
| C6orf70  | 4 | BEND7     | 3 |         |   |
| CDC42    | 4 | BRAP      | 3 |         |   |
| CEACAM3  | 4 | BTG3      | 3 |         |   |
| CEP63    | 4 | C17orf104 | 3 |         |   |
| CPN1     | 4 | C1QTNF7   | 3 |         |   |
| CPT1B    | 4 | C6orf10   | 3 |         |   |
| CTU2     | 4 | C6orf106  | 3 |         |   |
| DFNA5    | 4 | CABP4     | 3 |         |   |

|         |   |           |   |
|---------|---|-----------|---|
| DNAJB7  | 4 | CACNG3    | 3 |
| DSPP    | 4 | CADM4     | 3 |
| DTNB    | 4 | CCDC126   | 3 |
| DUSP26  | 4 | CCDC19    | 3 |
| EIF3G   | 4 | CCDC28B   | 3 |
| FAM27L  | 4 | CDC14A    | 3 |
| FPR2    | 4 | CDH15     | 3 |
| GLB1    | 4 | CDR2      | 3 |
| GPR39   | 4 | CMKLR1    | 3 |
| GRIN3B  | 4 | CPA4      | 3 |
| HK1     | 4 | CRTAC1    | 3 |
| HKR1    | 4 | CTH       | 3 |
| HMGCLL1 | 4 | CYP27B1   | 3 |
| ITGB2   | 4 | DCST2     | 3 |
| KCNAB1  | 4 | DDX18     | 3 |
| KCNJ8   | 4 | DDX23     | 3 |
| KCNK9   | 4 | DES       | 3 |
| KIF9    | 4 | DYRK2     | 3 |
| LGI4    | 4 | ENO3      | 3 |
| LGSN    | 4 | EPHB2     | 3 |
| LPXN    | 4 | FAIM3     | 3 |
| MAPK10  | 4 | FAM13B    | 3 |
| MED30   | 4 | FAM171B   | 3 |
| MYLK3   | 4 | FKBP4     | 3 |
| NBN     | 4 | FUT3      | 3 |
| NCDN    | 4 | GPT2      | 3 |
| NEDD4L  | 4 | HHLA3     | 3 |
| NEO1    | 4 | HIST1H2BN | 3 |
| OR14J1  | 4 | HSDL1     | 3 |
| OR1A2   | 4 | IL5RA     | 3 |
| OR52D1  | 4 | INF2      | 3 |
| OR52I2  | 4 | IQCB1     | 3 |
| OR52L1  | 4 | KCTD4     | 3 |
| OR6C70  | 4 | KLK13     | 3 |
| PAPOLB  | 4 | KRT6C     | 3 |
| PHLPP2  | 4 | LGALS9B   | 3 |
| PRPF38B | 4 | LHFP      | 3 |
| PSD2    | 4 | LRMP      | 3 |
| PTX3    | 4 | LRRFIP2   | 3 |
| RNF128  | 4 | MAPK8IP2  | 3 |
| SEC24D  | 4 | MEIS3     | 3 |
| SENP1   | 4 | MSN       | 3 |
| SHC4    | 4 | MTL5      | 3 |

|         |   |          |   |
|---------|---|----------|---|
| SLAIN2  | 4 | NBPF15   | 3 |
| SLC6A13 | 4 | NCR2     | 3 |
| SLC6A17 | 4 | NFIC     | 3 |
| SMAD3   | 4 | NPR1     | 3 |
| SMG5    | 4 | NXF5     | 3 |
| SOX2    | 4 | OGFR     | 3 |
| SPHK2   | 4 | OLFML1   | 3 |
| SYT5    | 4 | OR1L8    | 3 |
| SYT9    | 4 | OSBPL11  | 3 |
| TCP10L2 | 4 | P2RY8    | 3 |
| TEX9    | 4 | PAPLN    | 3 |
| TLE6    | 4 | PBLD     | 3 |
| TMEM206 | 4 | PDLIM3   | 3 |
| TPI1    | 4 | PIGN     | 3 |
| TRIM33  | 4 | PPIG     | 3 |
| TTC23L  | 4 | PPP1R3D  | 3 |
| UBXN6   | 4 | PRRG1    | 3 |
| VPS16   | 4 | PTDSS2   | 3 |
| WNT3    | 4 | PYHIN1   | 3 |
| ZFP36   | 4 | RAB25    | 3 |
| ZNF443  | 4 | RAPH1    | 3 |
| ZNF800  | 4 | REN      | 3 |
| AARS    | 3 | RHAG     | 3 |
| ABHD15  | 3 | RING1    | 3 |
| ABO     | 3 | RIT2     | 3 |
| ACOT8   | 3 | RTN4RL1  | 3 |
| ADAM15  | 3 | SERPINB8 | 3 |
| ADAMTS1 | 3 | SIGLEC5  | 3 |
| AGPAT3  | 3 | SIK2     | 3 |
| ALDH3A2 | 3 | SLC36A4  | 3 |
| AMACR   | 3 | SMC1A    | 3 |
| ANGPTL3 | 3 | SMYD5    | 3 |
| AP4M1   | 3 | SRFBP1   | 3 |
| APCDD1  | 3 | STXBP6   | 3 |
| APOL1   | 3 | TAS1R2   | 3 |
| ARHGEF2 | 3 | TBL1Y    | 3 |
| ARMC10  | 3 | TGFBRAP1 | 3 |
| ASB18   | 3 | TINAG    | 3 |
| ASTL    | 3 | TLR2     | 3 |
| ATF7    | 3 | TMEM154  | 3 |
| ATP5G2  | 3 | TOR1AIP1 | 3 |
| ATP9B   | 3 | TRAF3IP2 | 3 |
| AVEN    | 3 | TRIT1    | 3 |

|          |   |        |   |
|----------|---|--------|---|
| B3GALTL  | 3 | UBE3C  | 3 |
| BCAS2    | 3 | UNK    | 3 |
| C15orf32 | 3 | USP30  | 3 |
| C19orf18 | 3 | VRK2   | 3 |
| C1orf63  | 3 | VWA2   | 3 |
| C3orf37  | 3 | WDR45  | 3 |
| C4orf50  | 3 | WDR76  | 3 |
| C6orf62  | 3 | WDR92  | 3 |
| C9orf117 | 3 | WDYHV1 | 3 |
| CARKD    | 3 | ZBED1  | 3 |
| CCBL1    | 3 | ZBTB7A | 3 |
| CCDC105  | 3 | ZNF436 | 3 |
| CCDC74A  | 3 | ZNF566 | 3 |
| CCL25    | 3 | ZNF81  | 3 |
| CDC45    | 3 | ZNF823 | 3 |
| COQ10A   | 3 |        |   |
| CPEB4    | 3 |        |   |
| CSF3R    | 3 |        |   |
| CSPG5    | 3 |        |   |
| CTDSPL2  | 3 |        |   |
| CTNNB1   | 3 |        |   |
| CUZD1    | 3 |        |   |
| DCDC2    | 3 |        |   |
| DDHD2    | 3 |        |   |
| DHTKD1   | 3 |        |   |
| DMPK     | 3 |        |   |
| DNAJA3   | 3 |        |   |
| DYRK3    | 3 |        |   |
| EFNB1    | 3 |        |   |
| EIF5     | 3 |        |   |
| EMR3     | 3 |        |   |
| ESRP2    | 3 |        |   |
| ETNK2    | 3 |        |   |
| ETS1     | 3 |        |   |
| EXD1     | 3 |        |   |
| EXT1     | 3 |        |   |
| EXTL2    | 3 |        |   |
| FAM134A  | 3 |        |   |
| FAR2     | 3 |        |   |
| FBXL19   | 3 |        |   |
| FBXL20   | 3 |        |   |
| FBXL5    | 3 |        |   |
| FCN2     | 3 |        |   |

|           |   |
|-----------|---|
| FEZ1      | 3 |
| FOXO1     | 3 |
| GAB3      | 3 |
| GANAB     | 3 |
| GAS8      | 3 |
| GBA       | 3 |
| GFI1B     | 3 |
| GIN1      | 3 |
| GLTPD1    | 3 |
| GMPR2     | 3 |
| HBS1L     | 3 |
| HDAC11    | 3 |
| HIST1H2AK | 3 |
| HNRNPA1L2 | 3 |
| HORMAD1   | 3 |
| HS3ST6    | 3 |
| IFI44     | 3 |
| IGFBP1    | 3 |
| IL27RA    | 3 |
| IQCA1     | 3 |
| ITGB1BP2  | 3 |
| ITPK1     | 3 |
| KBTBD6    | 3 |
| KLHDC8B   | 3 |
| KLHL2     | 3 |
| KPNA3     | 3 |
| KRBA1     | 3 |
| KRT9      | 3 |
| LDHC      | 3 |
| LEMD3     | 3 |
| LRRC14    | 3 |
| LRRC42    | 3 |
| LRRIQ4    | 3 |
| MAGEB2    | 3 |
| MAPK8IP1  | 3 |
| MATK      | 3 |
| MEA1      | 3 |
| MEF2A     | 3 |
| MORC4     | 3 |
| MOXD1     | 3 |
| MPHOSPH9  | 3 |
| MRO       | 3 |
| MST4      | 3 |

|         |   |
|---------|---|
| MTERFD1 | 3 |
| MUM1L1  | 3 |
| MUTYH   | 3 |
| NAB1    | 3 |
| NCBP2   | 3 |
| NCF4    | 3 |
| NCKIPSD | 3 |
| NECAB2  | 3 |
| NFE2    | 3 |
| NHLRC3  | 3 |
| NOSIP   | 3 |
| NPVF    | 3 |
| NR2F1   | 3 |
| NT5DC1  | 3 |
| NUDT19  | 3 |
| OR10H2  | 3 |
| OR11A1  | 3 |
| OR13A1  | 3 |
| OR1J2   | 3 |
| OR4X2   | 3 |
| OR52R1  | 3 |
| OR6C74  | 3 |
| OSBPL2  | 3 |
| OSR1    | 3 |
| PACRGL  | 3 |
| PAPD5   | 3 |
| PARK2   | 3 |
| PARP15  | 3 |
| PDGFC   | 3 |
| PDPR    | 3 |
| PEX14   | 3 |
| PEX3    | 3 |
| PHEX    | 3 |
| PHLDA2  | 3 |
| PHYHD1  | 3 |
| POLH    | 3 |
| POLR1C  | 3 |
| POU3F4  | 3 |
| POU6F1  | 3 |
| PPP1R3B | 3 |
| PRSS54  | 3 |
| PSG1    | 3 |
| PSG4    | 3 |

|          |   |
|----------|---|
| PUS7     | 3 |
| RASSF2   | 3 |
| RFC1     | 3 |
| RGS1     | 3 |
| RNF175   | 3 |
| RNF214   | 3 |
| RPS6KA4  | 3 |
| S1PR1    | 3 |
| S1PR3    | 3 |
| SAMD11   | 3 |
| SCAPER   | 3 |
| SCARA3   | 3 |
| SCML1    | 3 |
| SDCBP    | 3 |
| SEC61A2  | 3 |
| SESN3    | 3 |
| SFTPA1   | 3 |
| SGCB     | 3 |
| SIAH2    | 3 |
| SKIL     | 3 |
| SLC15A4  | 3 |
| SLC25A12 | 3 |
| SLC26A4  | 3 |
| SLC6A16  | 3 |
| SLC6A4   | 3 |
| SMPDL3B  | 3 |
| SPAM1    | 3 |
| SPDYE3   | 3 |
| SPIB     | 3 |
| SPIN3    | 3 |
| SPRED1   | 3 |
| SRPR     | 3 |
| SRPX2    | 3 |
| SSRP1    | 3 |
| STK38    | 3 |
| SULT1C2  | 3 |
| SYCE1    | 3 |
| TADA2B   | 3 |
| TBC1D5   | 3 |
| TC2N     | 3 |
| TCTN3    | 3 |
| TEKT1    | 3 |
| TFPT     | 3 |



|           |   |
|-----------|---|
| TGFB11    | 3 |
| TGFB2     | 3 |
| THEM5     | 3 |
| TIGD3     | 3 |
| TIMM50    | 3 |
| TMED5     | 3 |
| TMEM106B  | 3 |
| TMEM52    | 3 |
| TNFRSF10A | 3 |
| TNFRSF11A | 3 |
| TNNI3K    | 3 |
| TOR1AIP2  | 3 |
| TRIM22    | 3 |
| TSHR      | 3 |
| TSPAN19   | 3 |
| TTC22     | 3 |
| TTLL8     | 3 |
| TUB       | 3 |
| TUBGCP5   | 3 |
| TUSC5     | 3 |
| UCP2      | 3 |
| VWC2      | 3 |
| WDR83     | 3 |
| WNT8B     | 3 |
| XAGE5     | 3 |
| XPO6      | 3 |
| ZBTB17    | 3 |
| ZBTB32    | 3 |
| ZBTB45    | 3 |
| ZDHHC16   | 3 |
| ZIC5      | 3 |
| ZNF185    | 3 |
| ZNF212    | 3 |
| ZNF25     | 3 |
| ZNF433    | 3 |
| ZNF514    | 3 |
| ZNF574    | 3 |
| ZNF7      | 3 |
| ZNHIT6    | 3 |

**Table S8. Chi-squared test of mutational correlation across ERG-defined tumor groups**

| <b>Gene</b> | <b>p-value</b> |
|-------------|----------------|
| TP53        | 1.19E-41       |
| CYLD        | 2.61E-07       |
| FGFR3       | 7.42E-07       |
| ZNF750      | 3.98E-06       |
| CASZ1       | 3.99E-06       |
| CDKN2A      | 4.59E-06       |
| LRFN5       | 1.65E-05       |
| FAT1        | 2.17E-05       |
| KIAA1407    | 3.68E-05       |
| GCKR        | 9.49E-05       |
| HRC         | 9.49E-05       |
| CCBE1       | 0.00010018     |
| FCGR2A      | 0.00010018     |
| ISY1        | 0.00010018     |
| NAB2        | 0.00010018     |
| RAB2A       | 0.00010018     |
| SLC25A19    | 0.00010018     |
| SYT14       | 0.00010018     |
| PDE7A       | 0.00010693     |
| PLK3        | 0.00010693     |
| DCC         | 0.00014158     |
| POLR3A      | 0.00037615     |
| PRPF6       | 0.00037615     |
| USH2A       | 0.00047616     |
| UBE3A       | 0.0005094      |
| FRMPD2      | 0.00065993     |
| ZNF507      | 0.00065993     |
| IMMT        | 0.00075988     |
| WASF2       | 0.00075988     |
| FAM47C      | 0.00085141     |
| CCDC136     | 0.00094384     |
| STAT3       | 0.00094384     |
| PRDM9       | 0.00100261     |
| ASAP1       | 0.00127103     |
| B2M         | 0.00136985     |
| IGF2R       | 0.00136985     |
| C19orf57    | 0.00162153     |
| CDC40       | 0.00162153     |
| IFNGR1      | 0.00162153     |

|           |            |
|-----------|------------|
| IGSF9     | 0.00162153 |
| SPATA6    | 0.00162153 |
| UBOX5     | 0.00162153 |
| ZCCHC2    | 0.00162153 |
| ASPSCR1   | 0.00188274 |
| CNR1      | 0.00188274 |
| FLOT2     | 0.00188274 |
| MAFB      | 0.00188274 |
| MFSD2A    | 0.00188274 |
| PVRL2     | 0.00188274 |
| RUFY1     | 0.00188274 |
| SEC24C    | 0.00188274 |
| ZNF543    | 0.00188274 |
| FOXP1     | 0.00190323 |
| ACP5      | 0.00218431 |
| ANGPTL7   | 0.00218431 |
| AP1AR     | 0.00218431 |
| ARSE      | 0.00218431 |
| BIN3      | 0.00218431 |
| C21orf128 | 0.00218431 |
| CAPS      | 0.00218431 |
| CDSN      | 0.00218431 |
| CEP55     | 0.00218431 |
| CINP      | 0.00218431 |
| COPZ2     | 0.00218431 |
| DPH3      | 0.00218431 |
| EIF2S1    | 0.00218431 |
| EMX1      | 0.00218431 |
| FKBP11    | 0.00218431 |
| FNDC7     | 0.00218431 |
| GGA3      | 0.00218431 |
| GNL1      | 0.00218431 |
| HMG20B    | 0.00218431 |
| HSPB8     | 0.00218431 |
| KATNB1    | 0.00218431 |
| KIR3DL3   | 0.00218431 |
| MAD2L2    | 0.00218431 |
| MED11     | 0.00218431 |
| MYLPF     | 0.00218431 |
| NCSTN     | 0.00218431 |
| NRG4      | 0.00218431 |

|         |            |
|---------|------------|
| NTNG2   | 0.00218431 |
| OR1F1   | 0.00218431 |
| OTC     | 0.00218431 |
| PCBP4   | 0.00218431 |
| PHF7    | 0.00218431 |
| POLR3D  | 0.00218431 |
| PPP1CB  | 0.00218431 |
| PRKD2   | 0.00218431 |
| PSPN    | 0.00218431 |
| RIOK1   | 0.00218431 |
| RNF113A | 0.00218431 |
| SLC3A1  | 0.00218431 |
| SMARCA5 | 0.00218431 |
| SPRR2E  | 0.00218431 |
| SUV39H2 | 0.00218431 |
| TBX10   | 0.00218431 |
| TOLLIP  | 0.00218431 |
| TOP1    | 0.00218431 |
| TRAIP   | 0.00218431 |
| TRIM59  | 0.00218431 |
| UBQLN1  | 0.00218431 |
| ZER1    | 0.00218431 |
| ZNF627  | 0.00218431 |
| KCNV1   | 0.00226475 |
| LRRC37B | 0.00236998 |
| RGPD3   | 0.00241233 |
| ZNF737  | 0.0029366  |
| TMCC1   | 0.00314486 |
| TMC5    | 0.00332407 |
| PDZD2   | 0.00403455 |
| NPTX2   | 0.00430089 |
| SDK2    | 0.00430089 |
| NLRC5   | 0.00431669 |
| DDX60   | 0.00507565 |
| SIN3B   | 0.00507565 |
| ATP11B  | 0.00546491 |
| ATP2A2  | 0.00546491 |
| GPR161  | 0.00546491 |
| GYP A   | 0.00546491 |
| MFHAS1  | 0.00546491 |
| PLEKHH1 | 0.00546491 |

|          |            |
|----------|------------|
| PSG2     | 0.00546491 |
| SEC23B   | 0.00546491 |
| THAP5    | 0.00546491 |
| STK11    | 0.00568997 |
| UBE2Q1   | 0.00568997 |
| SEMA3E   | 0.00570458 |
| EPHA7    | 0.00595071 |
| SPON1    | 0.00633617 |
| DDX3X    | 0.00658173 |
| KIAA1755 | 0.00658173 |
| ZNF211   | 0.00658173 |
| SLC35F4  | 0.00706217 |
| CASP8    | 0.00716753 |
| PCDHB8   | 0.00744123 |
| KDM2B    | 0.00910389 |
| AAK1     | 0.00918558 |
| FAS      | 0.00918558 |
| GNA15    | 0.00918558 |
| KRT38    | 0.00918558 |
| MED29    | 0.00918558 |
| MVP      | 0.00918558 |
| XIRP2    | 0.00918915 |
| C17orf70 | 0.0092765  |
| LIMK2    | 0.0092765  |
| NPAS4    | 0.0092765  |
| ANKRD30A | 0.00944802 |
| MYH13    | 0.00962007 |

**Table S9. Mutational correlation of Rb-E2F/p53 pathway genes in HPV(+) and HPV(-) tumors**

**RB1** pval=0.02307788

|   | 0   | 1  |
|---|-----|----|
| - | 428 | 12 |
| + | 62  | 6  |

**RBL1** pval=0.1378658

|   | 0   | 1 |
|---|-----|---|
| - | 433 | 7 |
| + | 65  | 3 |

**RBL2** pval=0.5797222

|   | 0   | 1 |
|---|-----|---|
| - | 435 | 5 |
| + | 67  | 1 |

**E2F1**

|   | 0   |
|---|-----|
| - | 440 |
| + | 68  |

**E2F2** pval=1

|   | 0   | 1 |
|---|-----|---|
| - | 437 | 3 |
| + | 68  | 0 |

**E2F3** pval=0.350814

|   | 0   | 1 |
|---|-----|---|
| - | 438 | 2 |
| + | 67  | 1 |

**E2F4** pval=1

|   | 0   | 1 |
|---|-----|---|
| - | 438 | 2 |

|   |    |   |
|---|----|---|
| + | 68 | 0 |
|---|----|---|

**E2F5** pval=0.5797222

|   | 0   | 1 |
|---|-----|---|
| - | 435 | 5 |
| + | 67  | 1 |

**E2F6** pval=0.1338583

|   | 0   | 1 |
|---|-----|---|
| - | 440 | 0 |
| + | 67  | 1 |

**E2F7** pval=0.08856862

|   | 0   | 1 |
|---|-----|---|
| - | 438 | 2 |
| + | 66  | 2 |

**E2F8** pval=0.4382292

|   | 0   | 1 |
|---|-----|---|
| - | 437 | 3 |
| + | 67  | 1 |

**CDKN1A**

|   | 0   |
|---|-----|
| - | 440 |
| + | 68  |

**CDKN1B** pval=0.350814

|   | 0   | 1 |
|---|-----|---|
| - | 438 | 2 |
| + | 67  | 1 |

**CDKN1C**

0

|   |     |
|---|-----|
| - | 440 |
| + | 68  |

**CDKN2A** pval=1.804049e-08

|   |          |          |
|---|----------|----------|
|   | <b>0</b> | <b>1</b> |
| - | 327      | 113      |
| + | 68       | 0        |

**CDKN2B**

|   |          |
|---|----------|
|   | <b>0</b> |
| - | 440      |
| + | 68       |

**CDKN2C** pval=1

|   |          |          |
|---|----------|----------|
|   | <b>0</b> | <b>1</b> |
| - | 439      | 1        |
| + | 68       | 0        |

**CDKN2D**

|   |          |
|---|----------|
|   | <b>0</b> |
| - | 440      |
| + | 68       |

**CCND1** pval=1

|   |          |          |
|---|----------|----------|
|   | <b>0</b> | <b>1</b> |
| - | 436      | 4        |
| + | 68       | 0        |

**CCNE1** pval=0.5140237

|   |          |          |
|---|----------|----------|
|   | <b>0</b> | <b>1</b> |
| - | 436      | 4        |
| + | 67       | 1        |

**CDK2**



|   | 0   |
|---|-----|
| - | 440 |
| + | 68  |

**CDK4** pval=1

|   | 0   | 1 |
|---|-----|---|
| - | 435 | 5 |
| + | 68  | 0 |

**CDK6** pval=1

|   | 0   | 1 |
|---|-----|---|
| - | 438 | 2 |
| + | 68  | 0 |

**TP53** pval=1.190944e-40

|   | 0  | 1   |
|---|----|-----|
| - | 81 | 359 |
| + | 67 | 1   |

**MDM2** pval=1

|   | 0   | 1 |
|---|-----|---|
| - | 438 | 2 |
| + | 68  | 0 |

**Table S10a****Normalized Count RNA Prediction Analysis (Confusion Matrix)**

|            |                 | Reference       |                |        |
|------------|-----------------|-----------------|----------------|--------|
|            |                 | HPV(-) High ERG | HPV(-) Low ERG | HPV(+) |
| Prediction | HPV(-) High ERG | 58              | 75             | 20     |
|            | HPV(-) Low ERG  | 58              | 111            | 17     |
|            | HPV(+)          | 48              | 77             | 35     |

**Normalized Count RNA Prediction Statistics**

|                      | HPV(-) High ERG | HPV(-) Low ERG | HPV(+)  |
|----------------------|-----------------|----------------|---------|
| Sensitivity          | 0.3537          | 0.4221         | 0.48611 |
| Specificity          | 0.7164          | 0.6822         | 0.70726 |
| Pos Pred Value       | 0.3791          | 0.5968         | 0.21875 |
| Neg Pred Value       | 0.6936          | 0.5144         | 0.89086 |
| Prevalence           | 0.3287          | 0.5271         | 0.14429 |
| Detection Rate       | 0.1162          | 0.2224         | 0.07014 |
| Detection Prevalence | 0.3066          | 0.3727         | 0.32064 |
| Balanced Accuracy    | 0.535           | 0.5521         | 0.59669 |

**Table S10b****123 Categorized RNA Prediction Analysis (Confusion Matrix)**

|            |                 | Reference       |                |        |
|------------|-----------------|-----------------|----------------|--------|
|            |                 | HPV(-) High ERG | HPV(-) Low ERG | HPV(+) |
| Prediction | HPV(-) High ERG | 141             | 28             | 3      |
|            | HPV(-) Low ERG  | 20              | 234            | 2      |
|            | HPV(+)          | 3               | 1              | 67     |

**123 Categorized RNA Prediction Statistics**

|                      | HPV(-) High ERG | HPV(-) Low ERG | HPV(+) |
|----------------------|-----------------|----------------|--------|
| Sensitivity          | 0.8598          | 0.8897         | 0.9306 |
| Specificity          | 0.9075          | 0.9068         | 0.9906 |
| Pos Pred Value       | 0.8198          | 0.9141         | 0.9437 |
| Neg Pred Value       | 0.9297          | 0.8801         | 0.9883 |
| Prevalence           | 0.3287          | 0.5271         | 0.1443 |
| Detection Rate       | 0.2826          | 0.4689         | 0.1343 |
| Detection Prevalence | 0.3447          | 0.513          | 0.1423 |
| Balanced Accuracy    | 0.8836          | 0.8983         | 0.9606 |
