# Supplementary material for: Identification of Head and Neck Cancer Subtypes Based on Human Papillomavirus Presence and E2F-Regulated Gene Expression
Source: PubMed Central journal article supplement (PMC5760753; doi:10.1128/msphere.00580-17), 2018-01-10

Figure S2

A

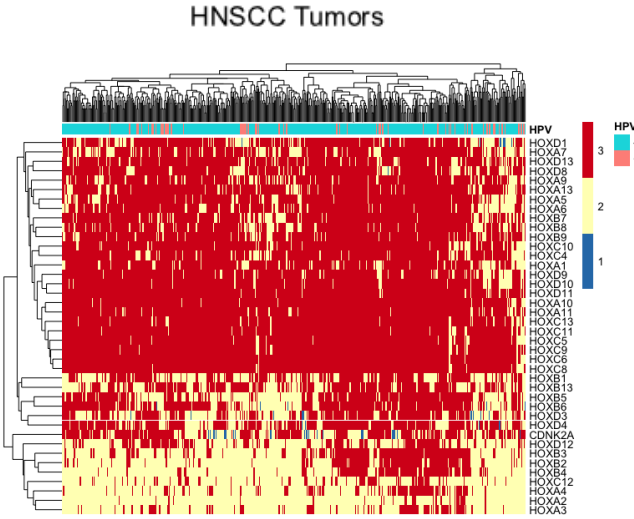

B

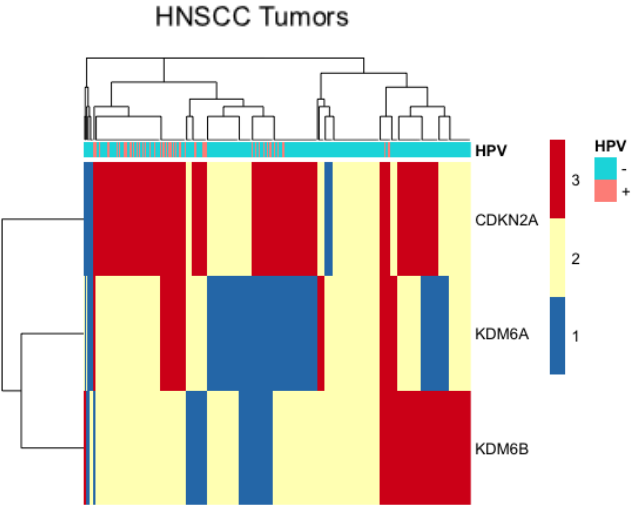

Supplement: sph001182443sf2.pdf [file sph001182443sf2.pdf]
